# Supplementary material
Source: HighWire-hosted journal article supplement (https://bmjopen.bmj.com/content/15/2/e088636)
Supplement: inline-supplementary-material-1 [file inline-supplementary-material-1.pdf]

## Semi-structured interview guide for wives

### Introduction:

Thank you for agreeing to participate in our interview. The purpose of our study is to explore how practicing Kangaroo Mother Care (KMC) with your husband influences your couple and family relationships. There are no right or wrong answers. Your responses will be kept confidential. You can withdraw from the interview and the study anytime without any negative consequences. Please feel free to share your honest experiences and feelings.

### Main questions:

- Can you describe your initial experiences with KMC?
- How did you and your husband decide to engage in KMC?
- In what ways has practicing KMC affected your emotional connection with your husband?
- Have you noticed any changes in how you support each other emotionally since starting KMC?
- How has KMC influenced your roles within the family?
- Have there been any changes in how you and your husband share caregiving responsibilities?
- How has your communication with your husband evolved since you began practicing KMC?
- Can you provide examples of how you discuss caregiving or infant care with each other?
- Have you encountered any conflicts or challenges related to practicing KMC? If so, how have you addressed them?
- What strategies have you and your husband used to resolve disagreements that arose during this period?
- In what ways has KMC influenced the emotional intimacy between you and your husband?
- Have you felt more connected or distant emotionally since engaging in KMC?
- How do you feel supported by your husband during the KMC process?
- Are there additional supports you wish were available to help strengthen your relationship while practicing KMC?
- How would you describe the overall impact of KMC on your relationship with your husband?
- What positive changes have you noticed, and are there any areas that you feel need improvement?

### Probing questions:

- Can you elaborate on that experience?
- How did that make you feel?
- Why do you think that change occurred?
- Can you share a specific example?
- How has this affected your daily interactions?

## Semi-structured interview guide for husbands

### Introduction:

Thank you for taking the time to participate in this interview. This study aims to understand how engaging in Kangaroo Mother Care with your wife has influenced your relationship and family dynamics. There are no right or wrong answers, and your responses will remain confidential. Please share your genuine experiences and feelings.

### Main questions:

- Can you describe your initial experiences with Kangaroo Mother Care?
- What motivated you and your wife to start practicing KMC?
- How has practicing KMC affected your emotional connection with your wife?
- Have you noticed any changes in how you support each other emotionally since starting KMC?
- How has KMC influenced your role within the family?
- Have there been any changes in how you and your wife share caregiving responsibilities?
- How has your communication with your wife evolved since you began practicing KMC?
- Can you provide examples of how you discuss caregiving or infant care with each other?
- Have you encountered any conflicts or challenges related to practicing KMC? If so, how have you addressed them?
- What strategies have you and your wife used to resolve disagreements that arose during this period?
- In what ways has KMC influenced the emotional intimacy between you and your wife?
- Have you felt more connected or distant emotionally since engaging in KMC?
- How do you feel supported by your wife during the KMC process?
- Are there additional supports you wish were available to help strengthen your relationship while practicing KMC?
- How would you describe the overall impact of KMC on your relationship with your wife?
- What positive changes have you noticed, and are there any areas that you feel need improvement?

### Probing prompts:

- Can you elaborate on that experience?
- How did that make you feel?
- Why do you think that change occurred?
- Can you share a specific example?
- How has this affected your daily interactions?
